# Supplementary material for: Thiol–ene adhesives from clove oil derivatives
Source: Royal Society of Chemistry journal article supplement (doi:10.1039/c4ra12020e), 2014-01-01
Supplement: c4ra12020e1.pdf [file c4ra12020e1.pdf]

## SUPPORTING INFORMATION

### Thiol-Ene Adhesives from Clove Oil Derivatives

Brian R. Donovan, Jared S. Cobb, Ethan F. T. Hoff, and Derek L. Patton\*

School of Polymers and High Performance Materials, The University of Southern Mississippi,  
118 College Dr. #5050, Hattiesburg MS 39406, USA

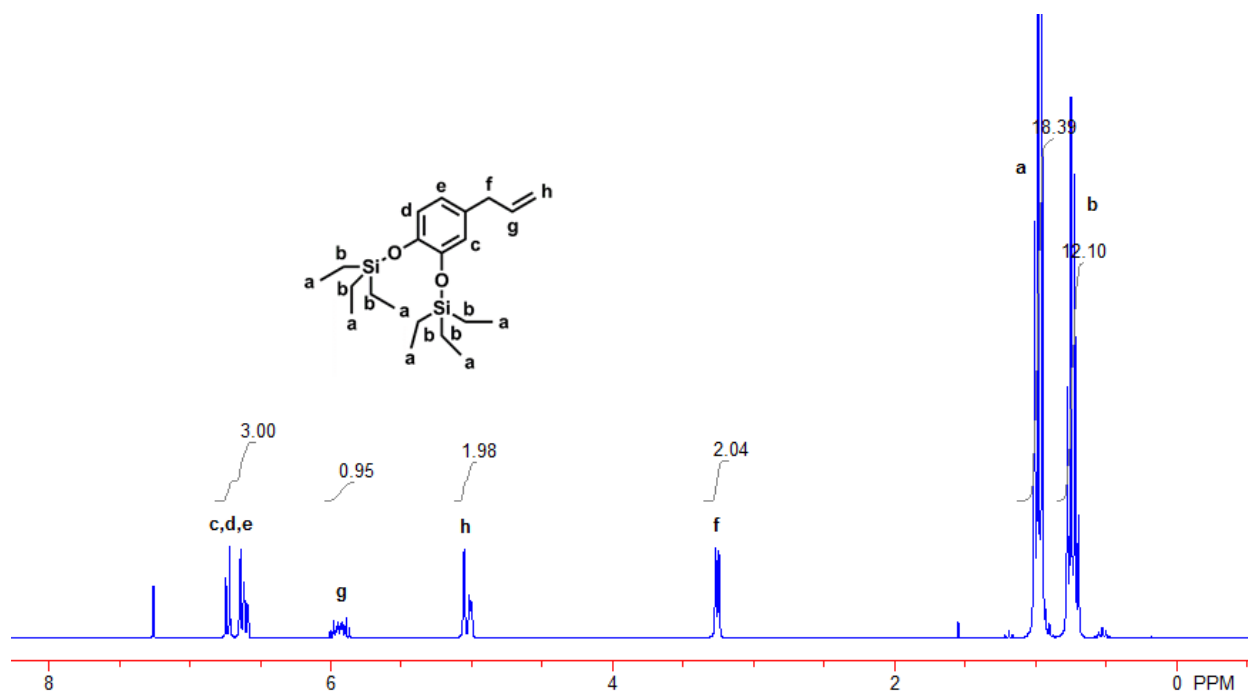

Figure S1. <sup>1</sup>H NMR spectrum of EugTES.

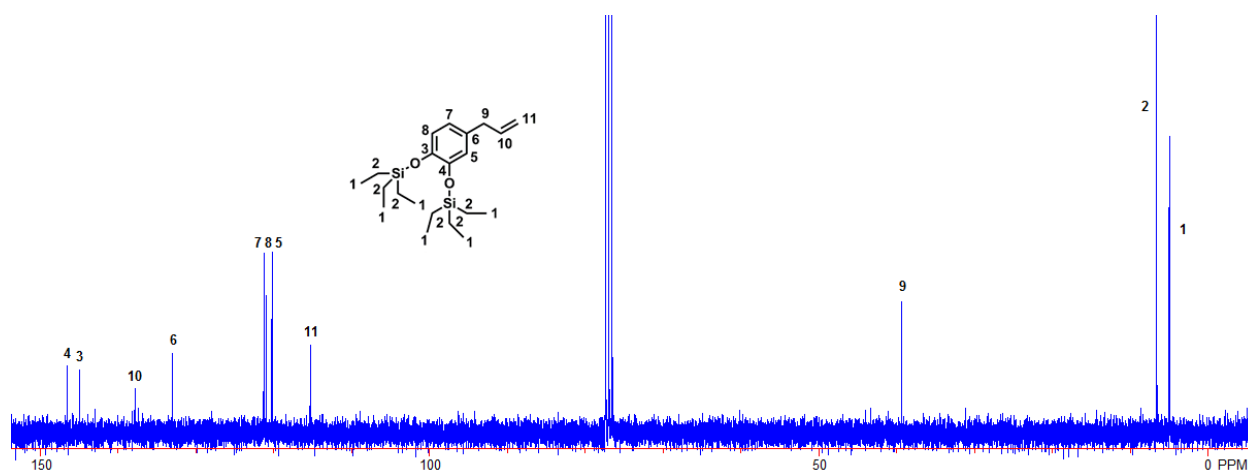

Figure S2. <sup>13</sup>C NMR spectrum of EugTES.

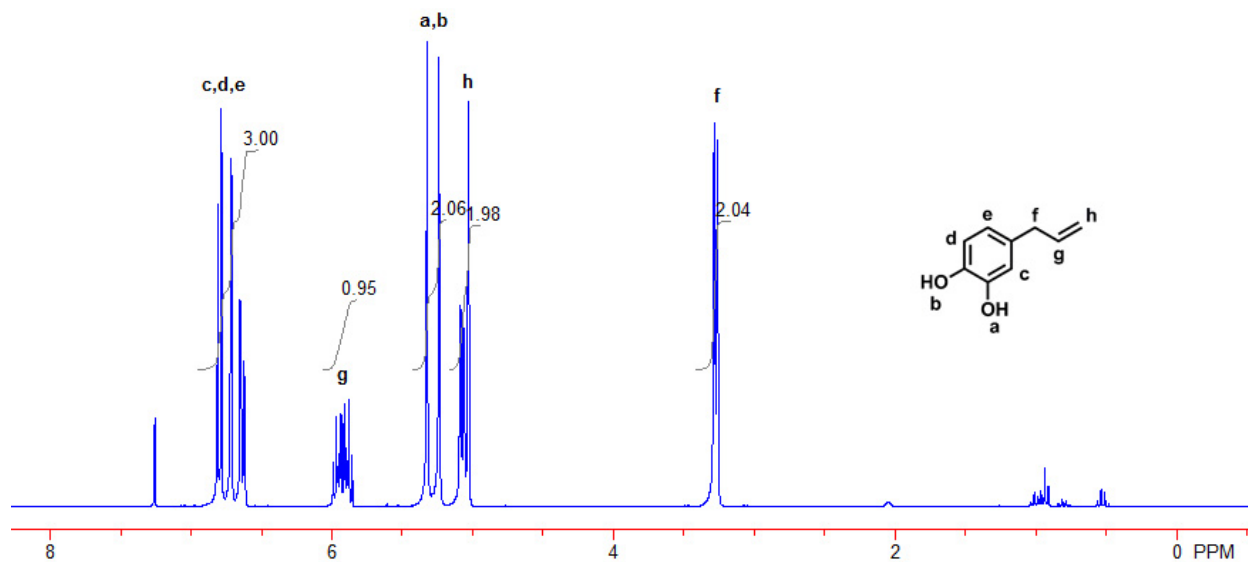

**Figure S4.** <sup>1</sup>H NMR spectrum of EugOH.

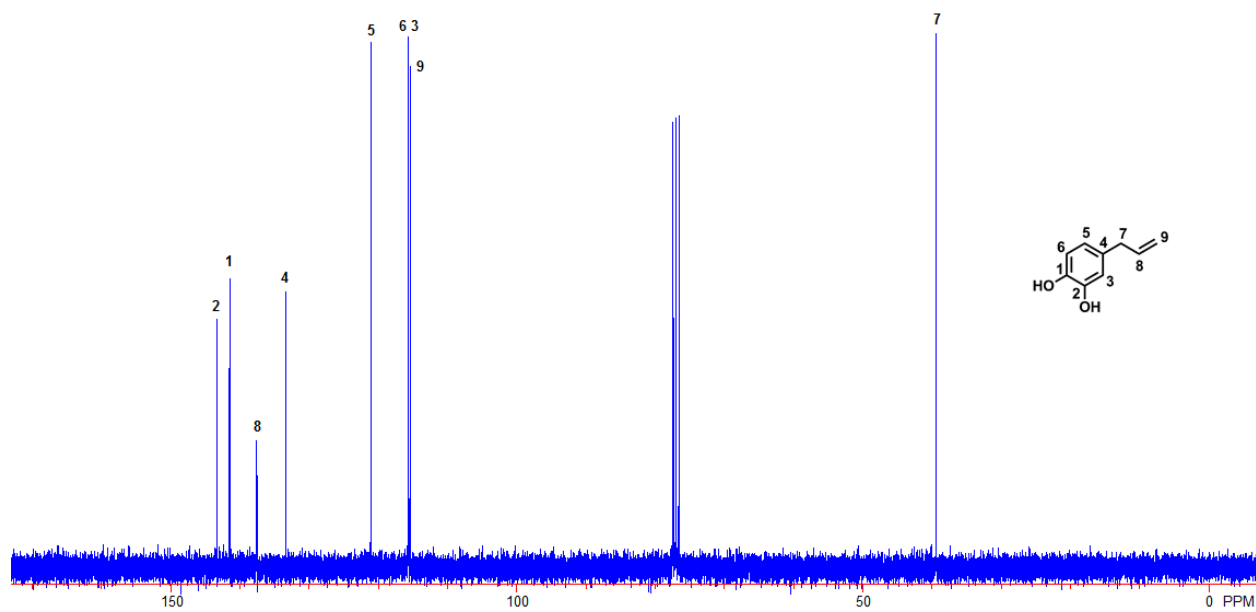

**Figure S3.** <sup>13</sup>C NMR spectrum EugOH.

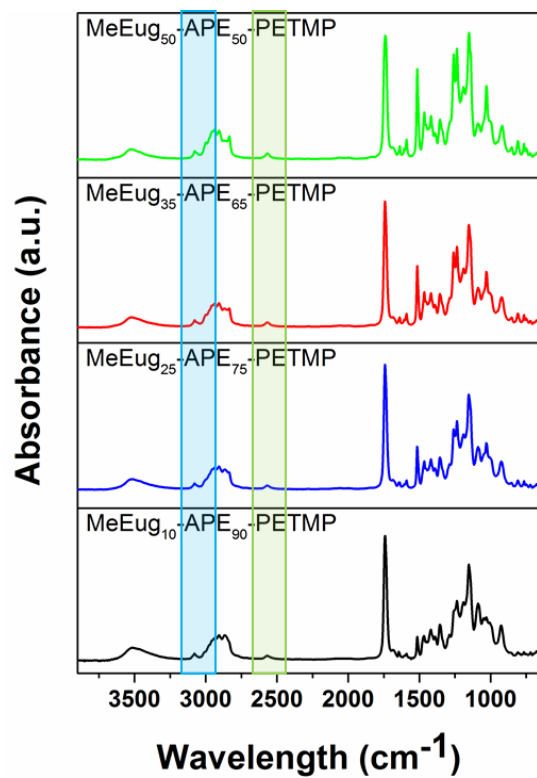

**Figure S5.** FTIR of unpolymerized MeEug-APE-PETMP monomer resins.

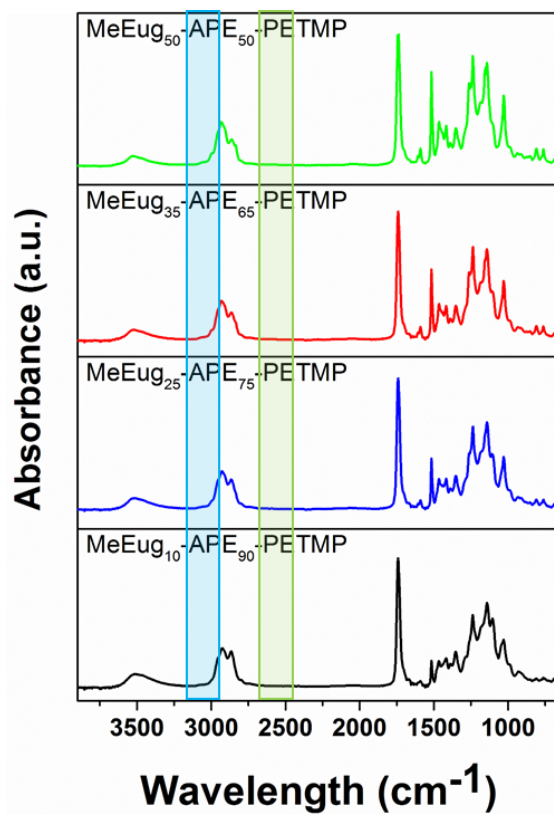

**Figure S6.** FTIR of polymerized MeEug-APE-PETMP ternary polymer networks.

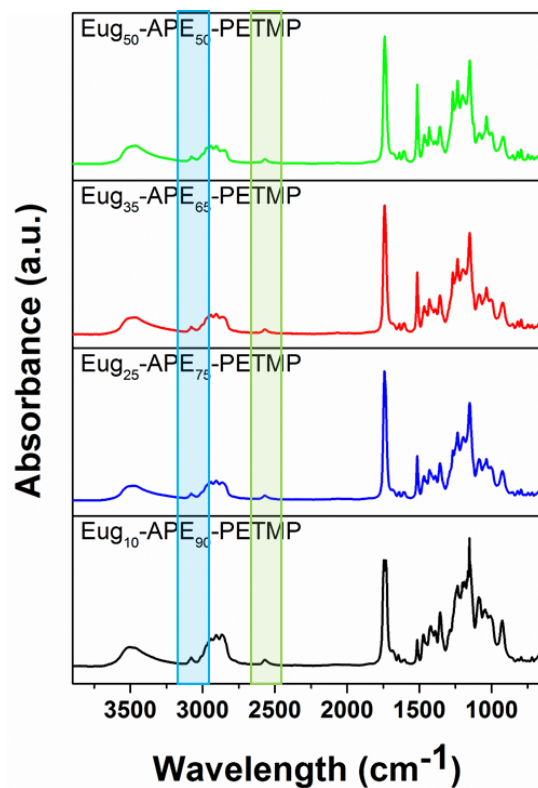

**Figure S7.** FTIR of unpolymerized Eug-APE-PETMP resins.

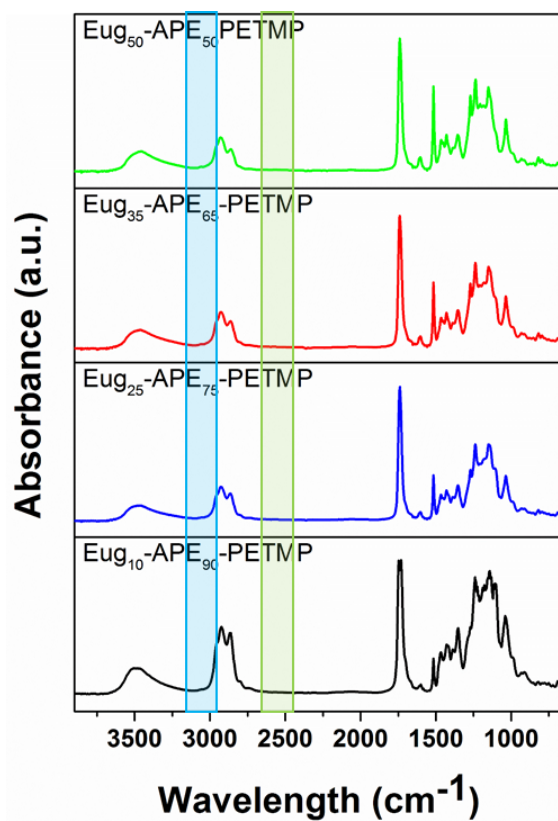

**Figure S8.** FTIR of polymerized Eug-APE-PETMP ternary polymer networks.

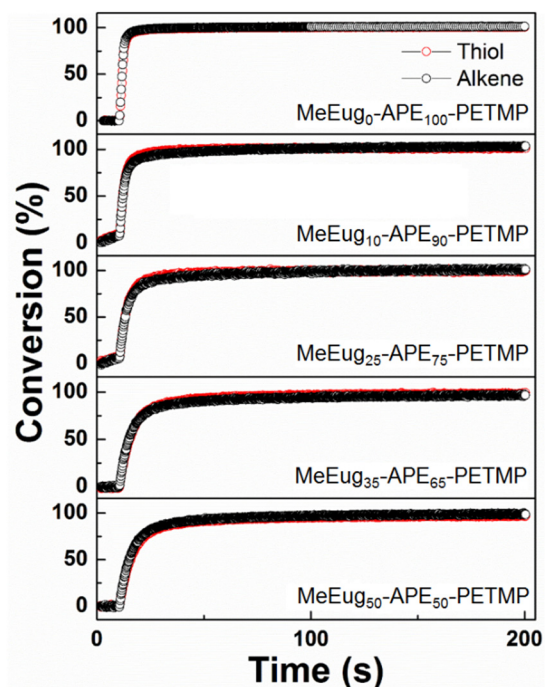

**Figure S9.** Kinetic plots of conversion vs time for MeEug-APE-PETMP thiol-ene networks. (a) 0 mol % MeEug, (b) 10 mol % MeEug, (c) 25 mol % MeEug, (d) 35 mol % MeEug, (e) 50 mol % MeEug.

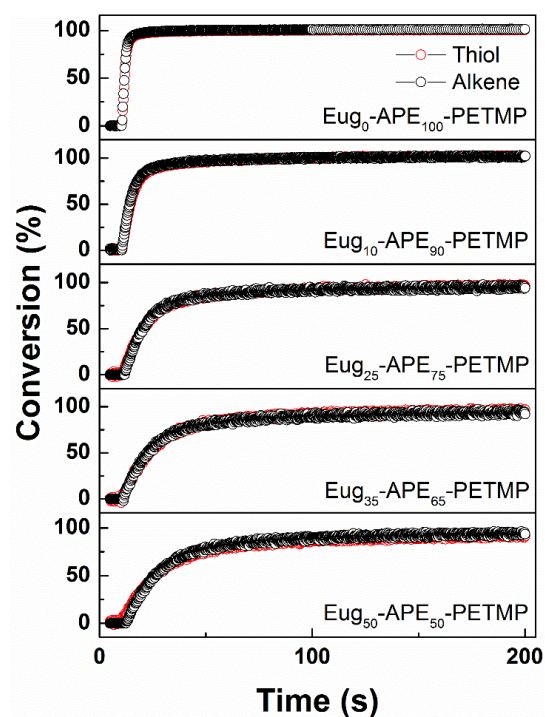

**Figure S10.** Kinetic plots of conversion vs time for Eug-APE-PETMP thiol-ene networks. (a) 0 mol % Eug, (b) 10 mol % Eug, (c) 25 mol % Eug, (d) 35 mol % Eug, (e) 50 mol % Eug.

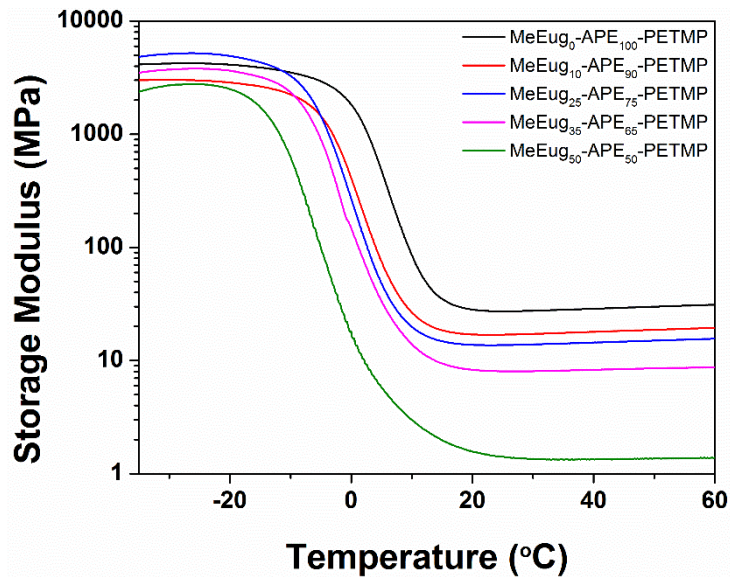

**Figure S11.** Storage modulus vs. temperature for the MeEug-APE-PETMP polymer networks with varying concentrations of MeEug (0-50 mol%).

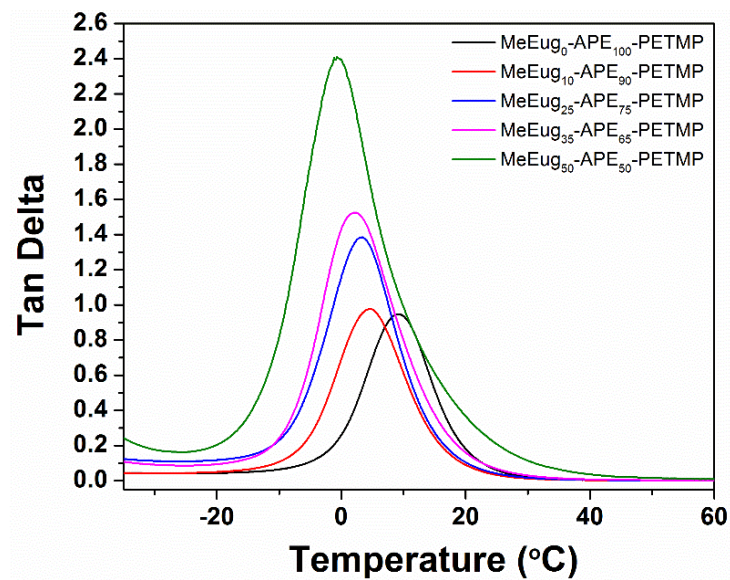

**Figure S12.** Tan  $\delta$  vs. temperature for the MeEug-APE-PETMP polymer networks with varying concentrations of MeEug (0-50 mol %).



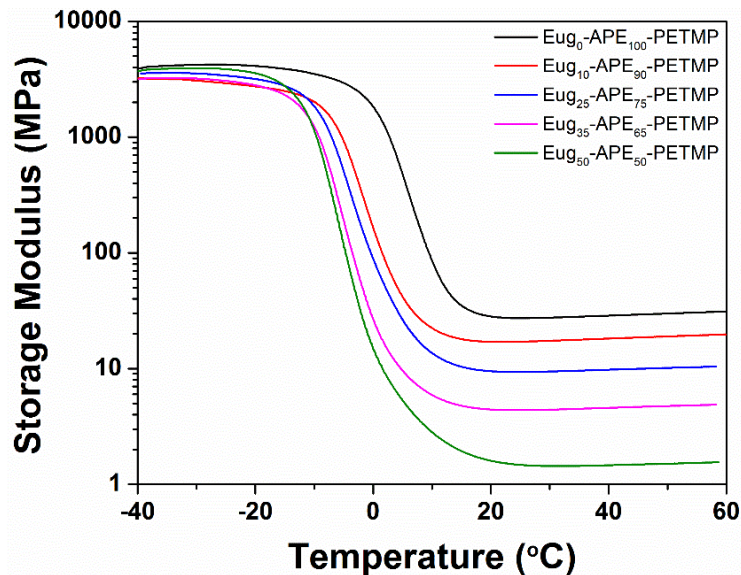

**Figure S13.** Storage modulus vs. temperature for the Eug-APE-PETMP polymer networks with varying concentrations of Eug (0-50 mol%).

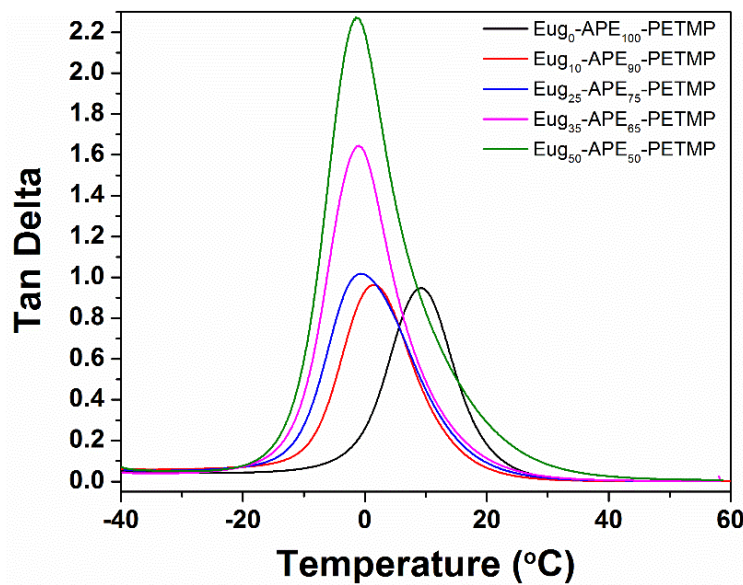

**Figure S14.**  $\tan \delta$  vs. temperature for the Eug-APE-PETMP polymer networks with varying concentrations of Eug (0-50 mol %).
